# Supplementary material
Source: MDPI journal article supplement (https://www.mdpi.com/2073-4441/13/21/2993)
Supplement: s1 [file s1]

Table S1. Study sites.

| Plots | Date       | N °        | E °        | elevation (m) | Point | Reflectance cluster |
|-------|------------|------------|------------|---------------|-------|---------------------|
| 1     | 07.08.2013 | 43°11.980' | 42°45.381' | 2938          | 1     | I                   |
|       |            |            |            |               | 2     | II                  |
|       |            |            |            |               | 3     | III                 |
| 2     | 07.08.2013 | 43°11.880' | 42°45.459' | 2987          | 1     | II                  |
|       |            |            |            |               | 2     | II                  |
| 3     | 10.08.2013 | 43°11.885' | 42°45.495' | 2991          | 1     | II                  |
|       |            |            |            |               | 2     | II                  |
|       |            |            |            |               | 3     | III                 |
| 4     | 10.08.2013 | 43°11.888' | 42°45.435' | 2992          | 1     | II                  |
|       |            |            |            |               | 2     | IV                  |
|       |            |            |            |               | 3     | IV                  |
| 5     | 10.08.2013 | 43°11.896' | 42°45.557' | 2994          | 1     | III                 |
|       |            |            |            |               | 2     | III                 |
|       |            |            |            |               | 3     | III                 |
| 6     | 10.08.2013 | 43°11.899' | 42°45.673' | 3026          | 1     | I                   |
|       |            |            |            |               | 2     | III                 |
|       |            |            |            |               | 3     | III                 |
| 7     | 10.08.2013 | 43°11.963' | 42°45.511' | 2960          | 1     | III                 |
|       |            |            |            |               | 2     | I                   |
|       |            |            |            |               | 3     | III                 |
| 8     | 10.08.2013 | 43°11.951' | 42°45.501' | 2957          | 1     | III                 |
|       |            |            |            |               | 2     | III                 |
|       |            |            |            |               | 3     | III                 |
|       |            |            |            |               | 4     | III                 |
| 9     | 10.08.2013 | 43°11.928' | 42°45.450' | 2956          | 1     | III                 |
|       |            |            |            |               | 2     | III                 |
|       |            |            |            |               | 3     | III                 |
| 10    | 11.08.2013 | 43°11.909' | 42°45.399' | 2962          | 1     | II                  |
|       |            |            |            |               | 2     | II                  |
|       |            |            |            |               | 3     | III                 |
| 11    | 11.08.2013 | 43°11.885' | 42°45.385' | 2964          | 1     | III                 |
|       |            |            |            |               | 2     | II                  |
|       |            |            |            |               | 3     | I                   |
| 12    | 11.08.2013 | 43°11.920' | 42°45.306' |               | 1     | III                 |
|       |            |            |            |               | 2     | I                   |
|       |            |            |            |               | 3     | II                  |
| 13    | 11.08.2013 | 43°12.005' | 42°45.408' | 2937          | 1     | III                 |
|       |            |            |            |               | 2     | III                 |
|       |            |            |            |               | 3     | III                 |
| 14    | 11.08.2013 | 43°12.063' | 42°45.284' | 2904          | 1     | III                 |

|    |            |            |            |      |   |     |
|----|------------|------------|------------|------|---|-----|
|    |            |            |            |      | 2 | III |
|    |            |            |            |      | 3 | I   |
| 15 | 11.08.2013 | 43°12.025' | 42°45.251' | 2906 | 1 | III |
|    |            |            |            |      | 2 | III |
|    |            |            |            |      | 3 | I   |
| 16 | 11.08.2013 | 43°12.057' | 42°45.194' | 2886 | 1 | II  |
|    |            |            |            |      | 2 | II  |
| 17 | 11.08.2013 | 43°12.122' | 42°45.147' | 2847 | 1 | II  |
|    |            |            |            |      | 2 | II  |
| 18 | 11.08.2013 | 43°12.184' | 42°45.071' | 2793 | 1 | III |
